# Supplementary material
Source: PubMed Central journal article supplement (PMC3896239)

## SUPPORTING INFORMATION

### Phomapyrrolidones A–C, Antitubercular Alkaloids from the Endophytic Fungus

#### *Phoma* sp. NRRL 46751

E. M. Kithsiri Wijeratne,<sup>†,‡</sup> Hongping He,<sup>†,‡</sup> Scott G. Franzblau,<sup>§</sup> Angela M. Hoffman,<sup>⊥</sup> and A. A. Leslie Gunatilaka<sup>†,\*</sup>

<sup>†</sup>Southwest Center for Natural Products Research and Commercialization, School of Natural Resources and the Environment, College of Agriculture and Life Sciences, The University of Arizona, 250 E. Valencia Road, Tucson, Arizona 85706, United States

<sup>§</sup>Institute for Tuberculosis Research, College of Pharmacy, University of Illinois at Chicago, 833 S. Wood St., Chicago, Illinois 60612, United States

<sup>⊥</sup>Department of Chemistry, University of Portland, 5000 N. Willamette Blvd, Portland, Oregon 97203, United States

\* To whom correspondence should be addressed. Tel: (520) 621-9932. Fax: (520) 621-8378. E-mail: [leslieg@cals.arizona.edu](mailto:leslieg@cals.arizona.edu).

## Table of Content

For compound **1**:

- S1.**  $^1\text{H}$  NMR spectrum (400 MHz) of **1** in  $\text{CDCl}_3$
- S2.**  $^{13}\text{C}$  NMR spectrum (100 MHz) of **1** in  $\text{CDCl}_3$
- S3.**  $^1\text{H}$ - $^1\text{H}$  COSY spectrum of **1** in  $\text{CDCl}_3$
- S4.** HSQC spectrum of **1** in  $\text{CDCl}_3$
- S5.** HMBC spectrum of **1** in  $\text{CDCl}_3$
- S6.** ROESY spectrum of **1** in  $\text{CDCl}_3$

For compound **2**:

- S7.**  $^1\text{H}$  NMR spectrum (400 MHz) of **2** in  $\text{CDCl}_3$
- S8.**  $^{13}\text{C}$  NMR spectrum (100 MHz) of **2** in  $\text{CDCl}_3$
- S9.**  $^1\text{H}$ - $^1\text{H}$  COSY spectrum of **2** in  $\text{CDCl}_3$
- S10.** HSQC spectrum of **2** in  $\text{CDCl}_3$
- S11.** HMBC spectrum of **2** in  $\text{CDCl}_3$
- S12.** ROESY spectrum of **2** in  $\text{CDCl}_3$

For compound **3**:

- S13.**  $^1\text{H}$  NMR spectrum (400 MHz) of **3** in  $\text{CDCl}_3$
- S14.**  $^{13}\text{C}$  NMR spectrum (100 MHz) of **3** in  $\text{CDCl}_3$
- S15.**  $^1\text{H}$ - $^1\text{H}$  COSY spectrum of **3** in  $\text{CDCl}_3$
- S16.** HSQC spectrum of **3** in  $\text{CDCl}_3$
- S17.** HMBC spectrum of **3** in  $\text{CDCl}_3$
- S18.** ROESY spectrum of **3** in  $\text{CDCl}_3$

For compound **4**:

- S19.**  $^1\text{H}$  NMR spectrum (400 MHz) of **4** in  $\text{CDCl}_3$
- S20.**  $^{13}\text{C}$  NMR spectrum (100 MHz) of **4** in  $\text{CDCl}_3$

S1. <sup>1</sup>H NMR spectrum (400 MHz) of **1** in CDCl<sub>3</sub>

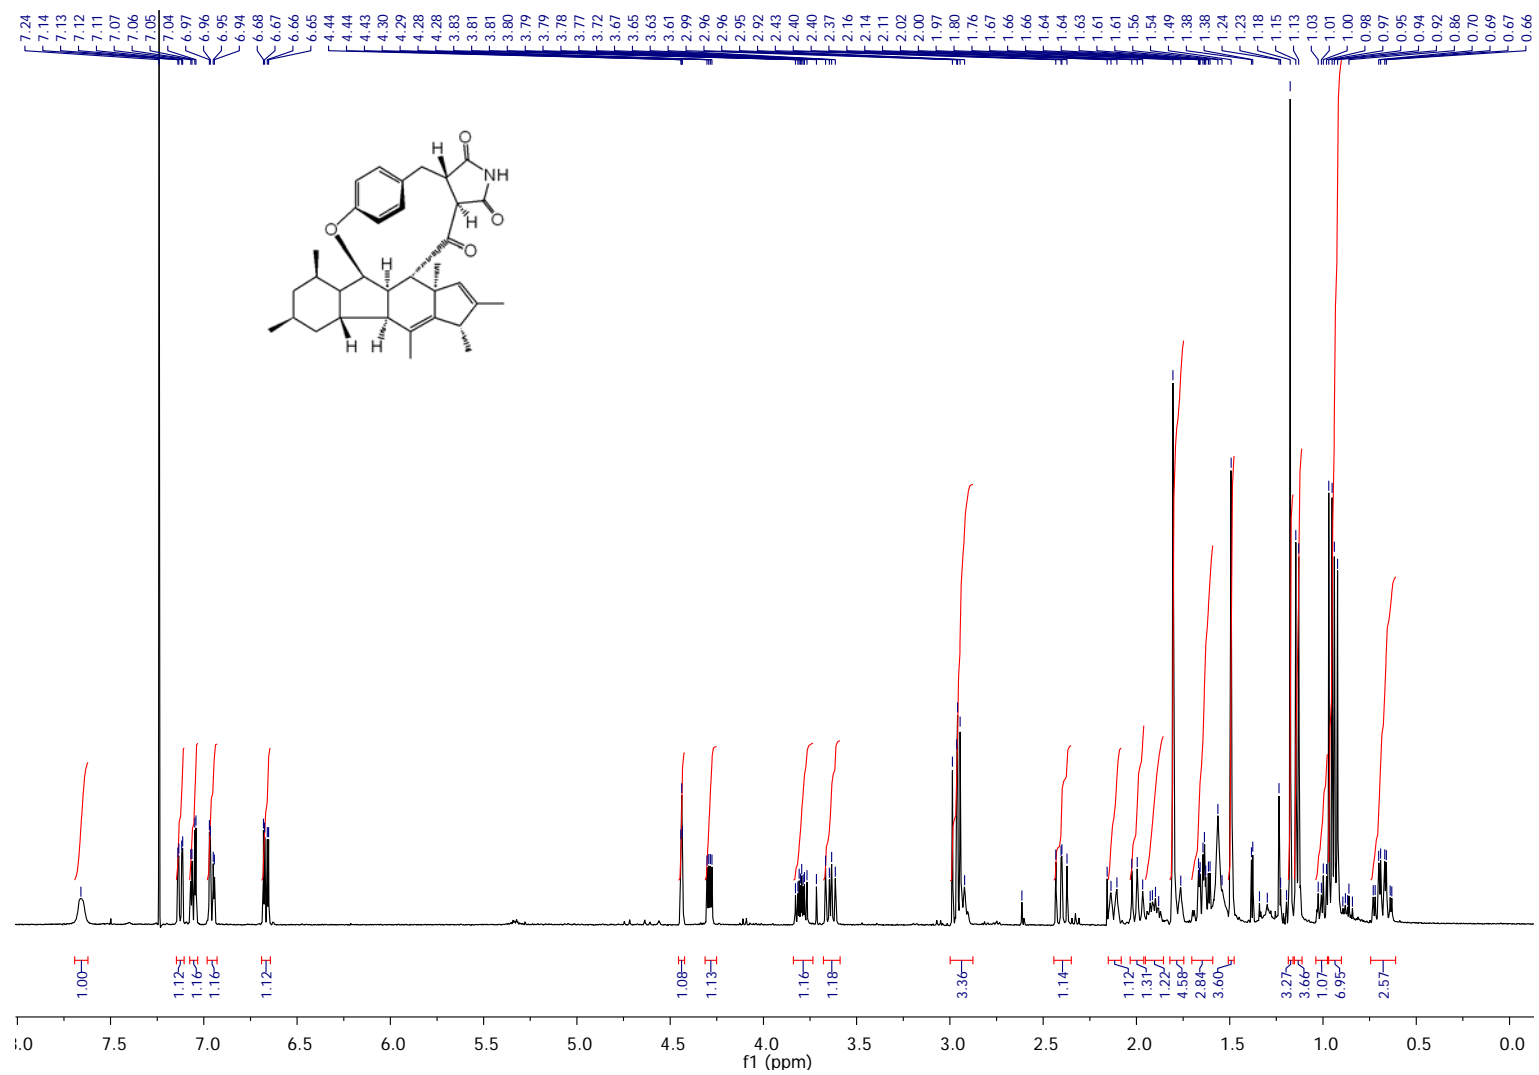

S2.  $^{13}\text{C}$  NMR spectrum (100 MHz) of **1** in  $\text{CDCl}_3$

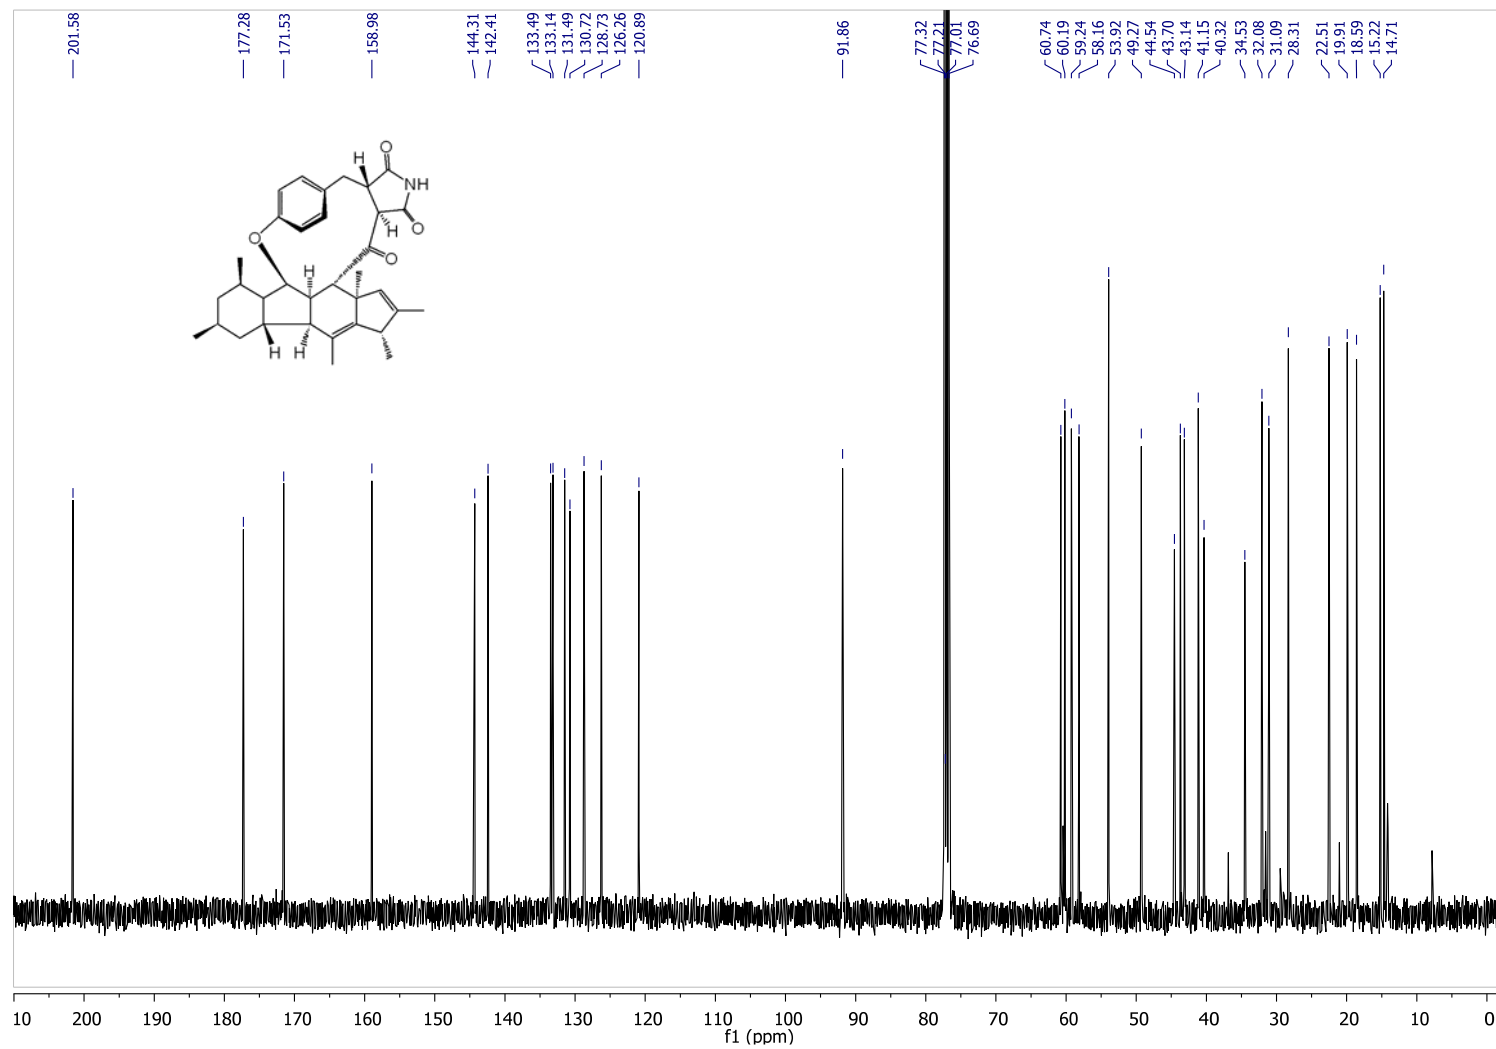

S3.  $^1\text{H}$ - $^1\text{H}$  COSY spectrum of **1** in  $\text{CDCl}_3$

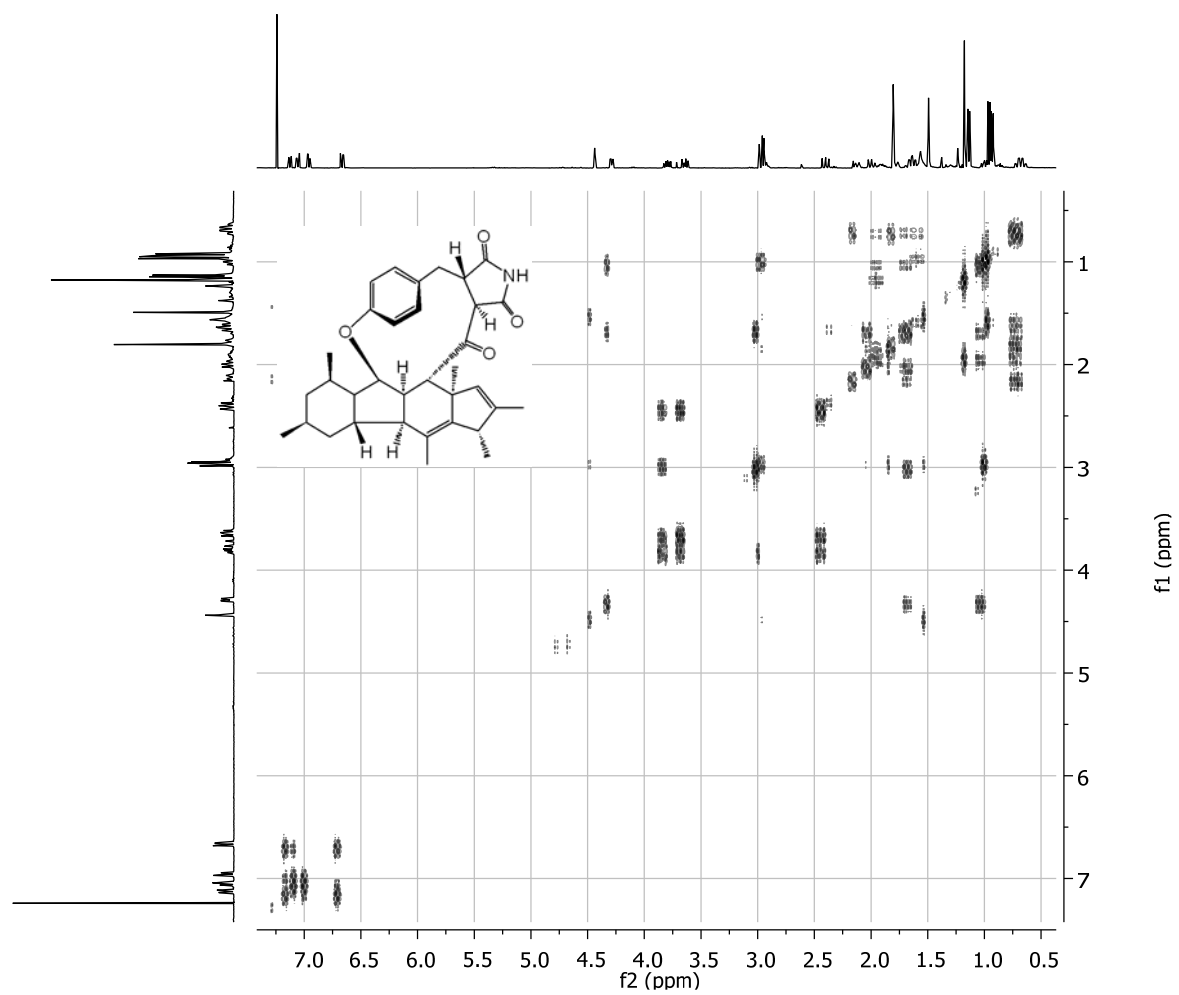

S4. HSQC spectrum of **1** in CDCl<sub>3</sub>

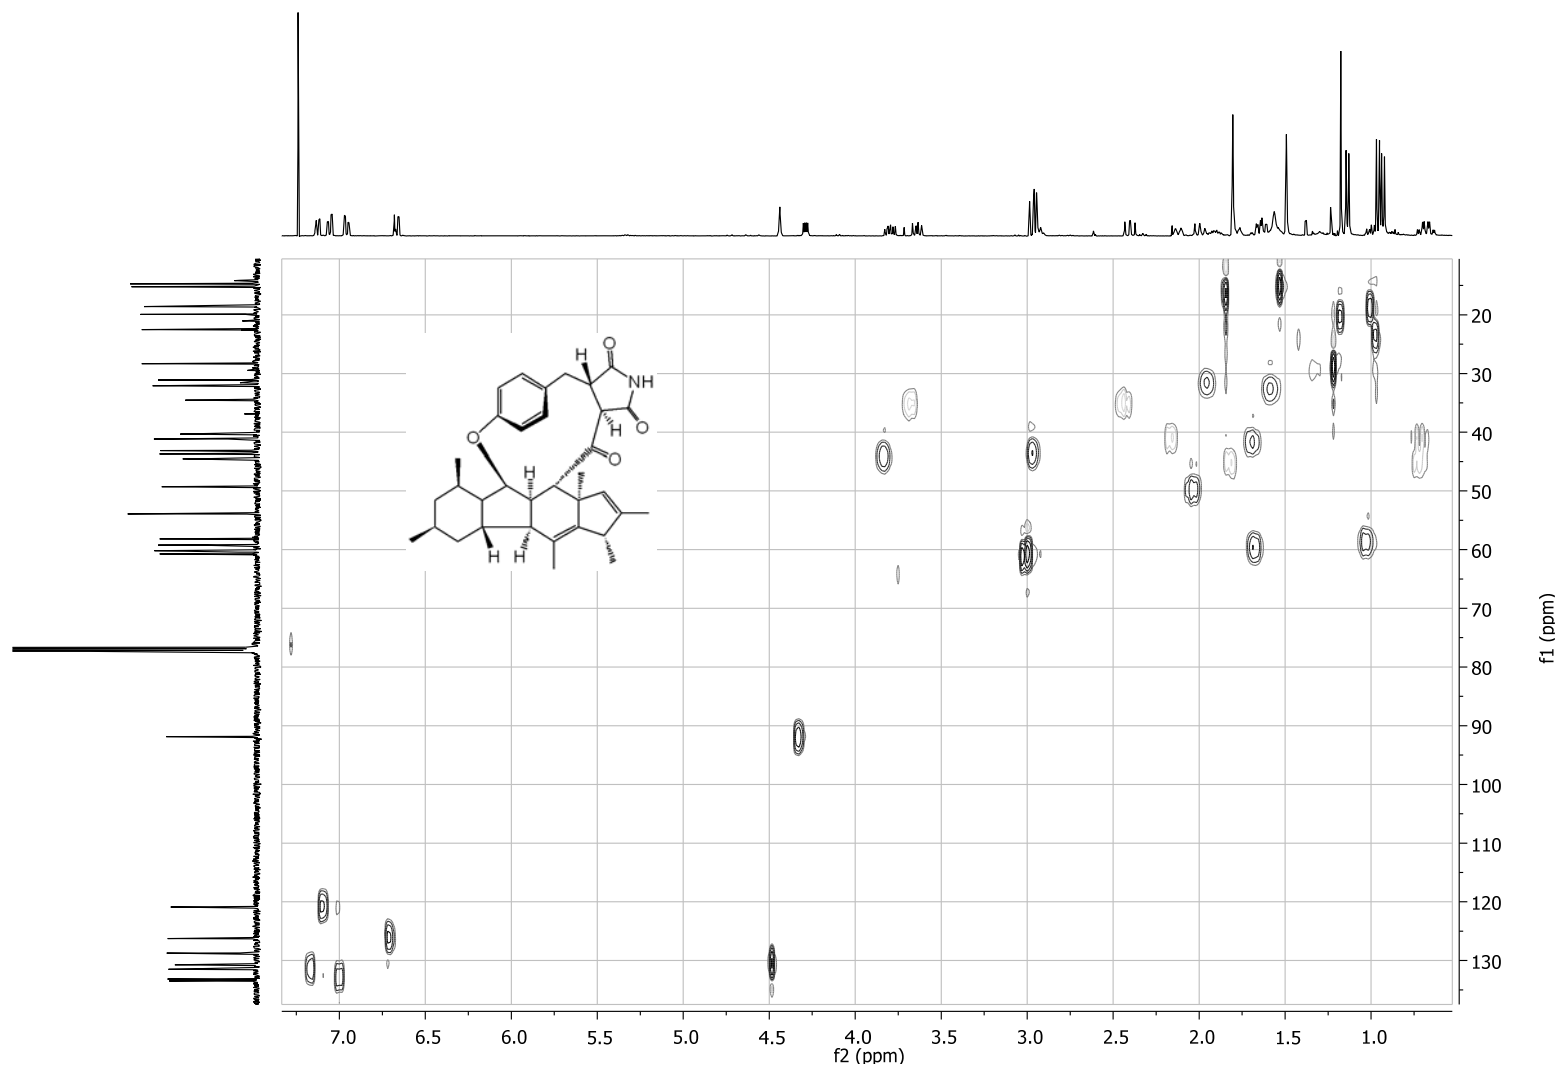

S5. HMBC spectrum of **1** in CDCl<sub>3</sub>

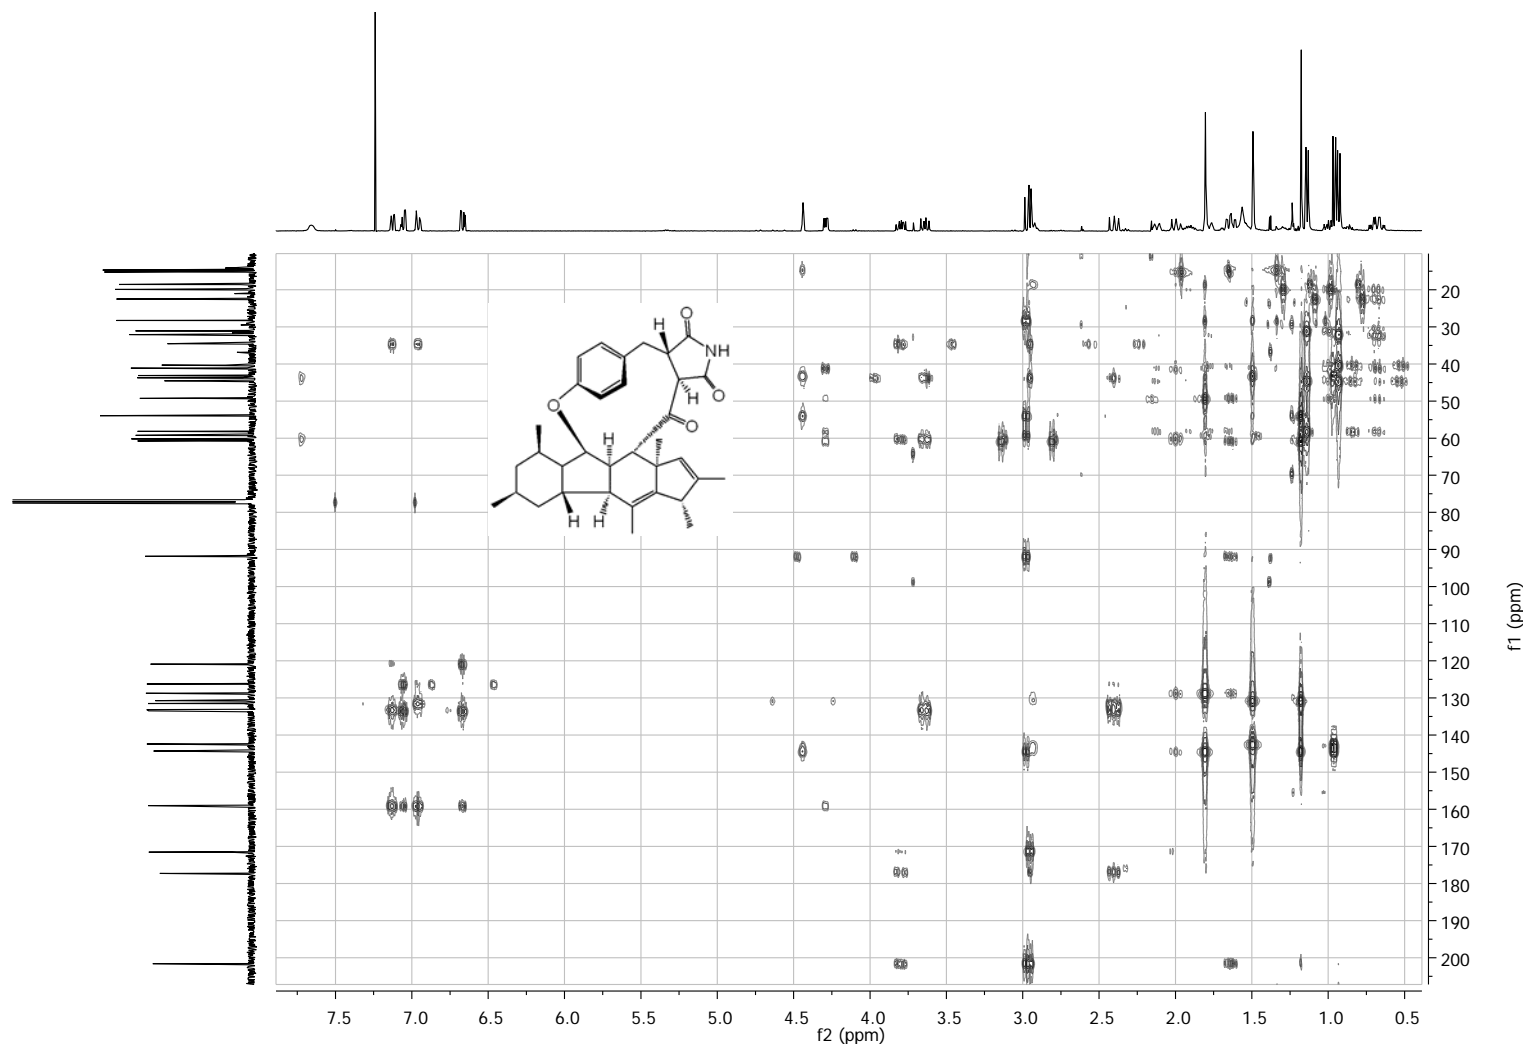

S6. ROESY spectrum of **1** in CDCl<sub>3</sub>

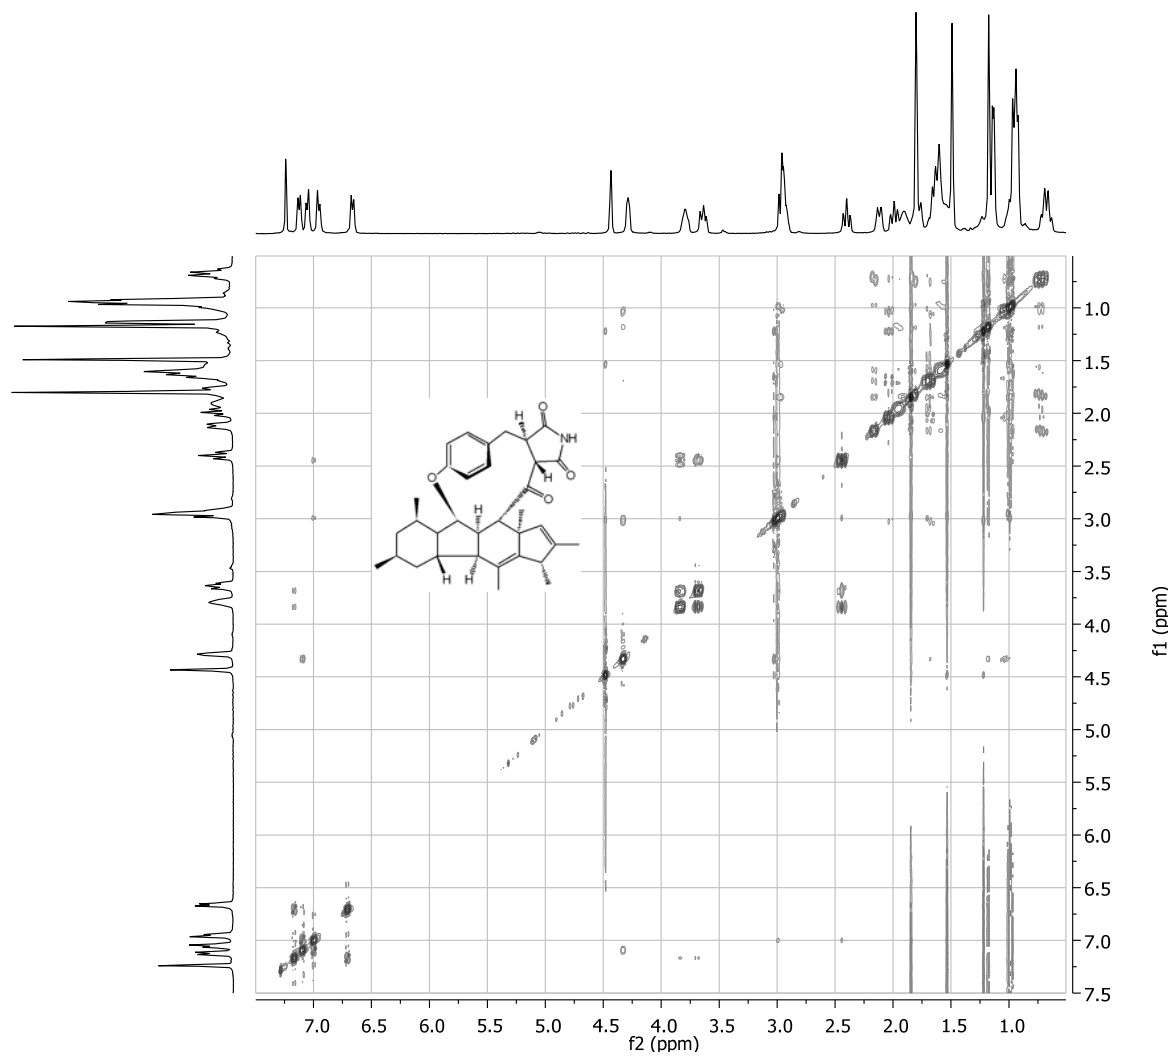



S7.  $^1\text{H}$  NMR spectrum (400 MHz) of **2** in  $\text{CDCl}_3$

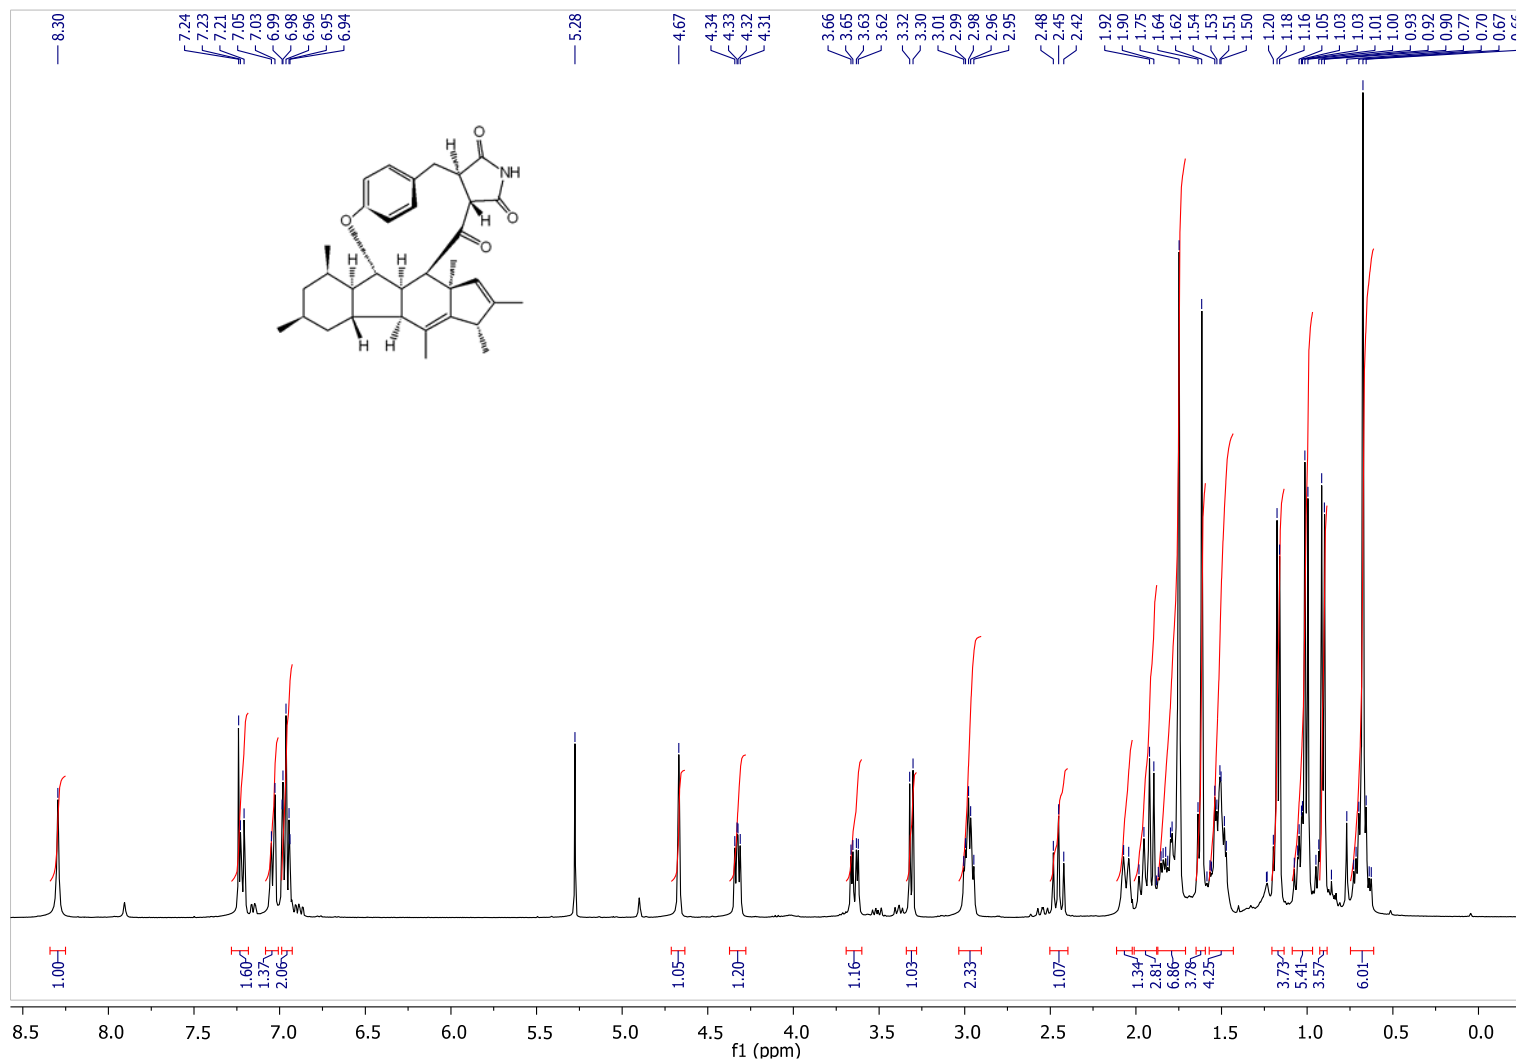

S8.  $^{13}\text{C}$  NMR spectrum (100 MHz) of **2** in  $\text{CDCl}_3$

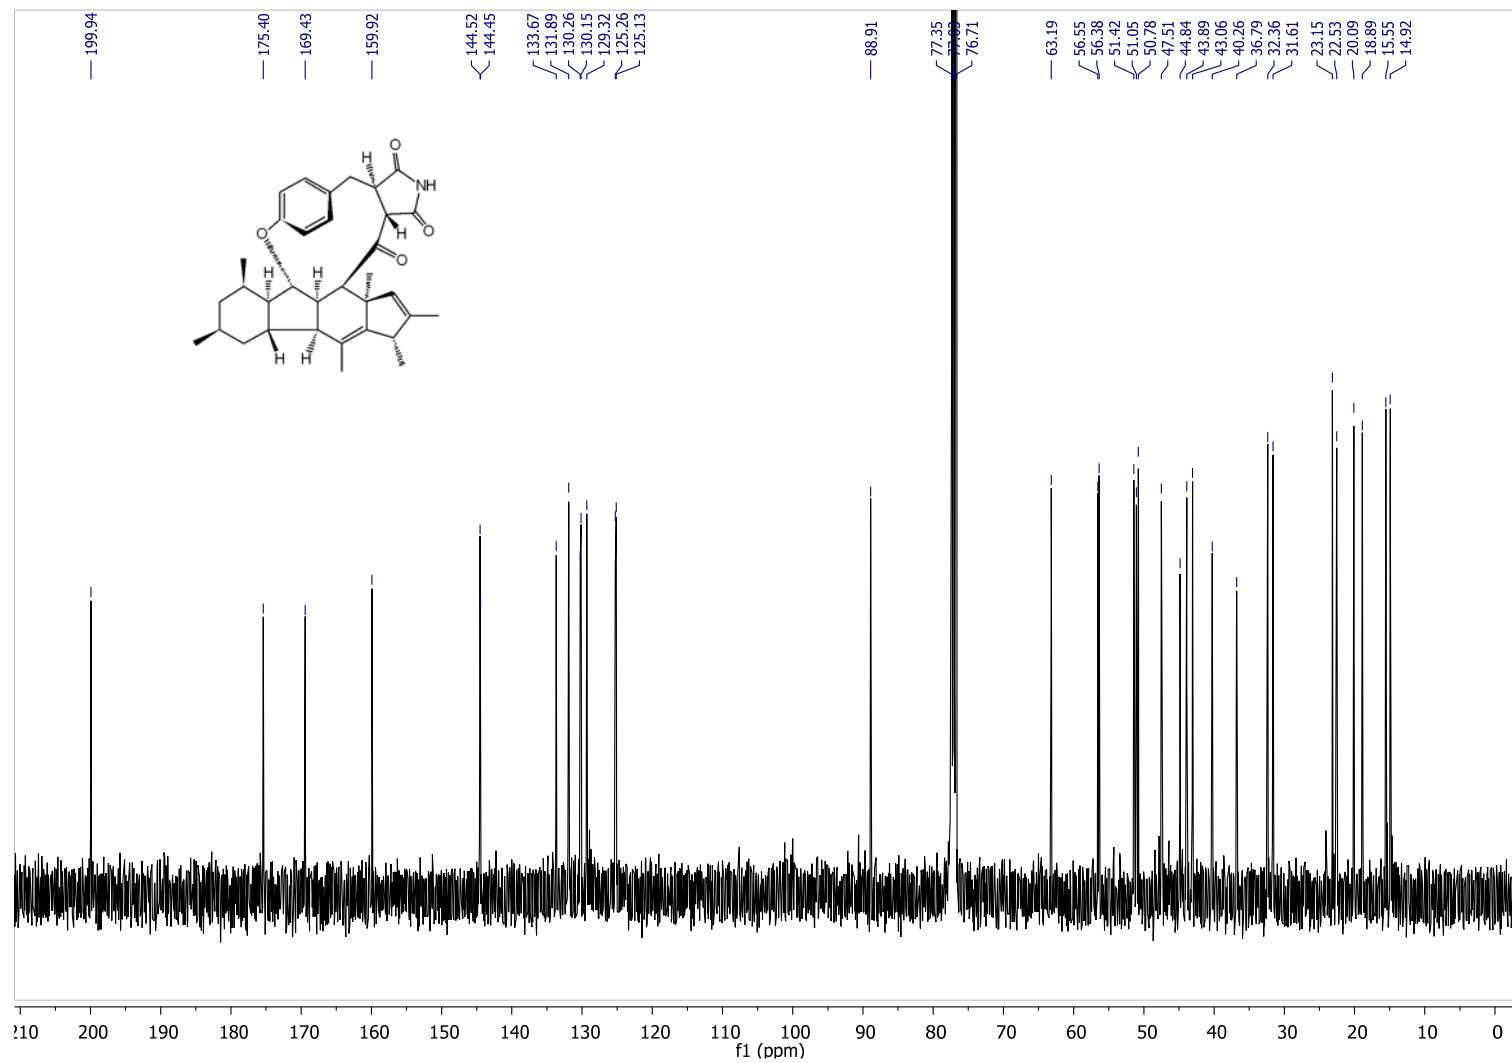

S9.  $^1\text{H}$ - $^1\text{H}$  COSY spectrum of **2** in  $\text{CDCl}_3$

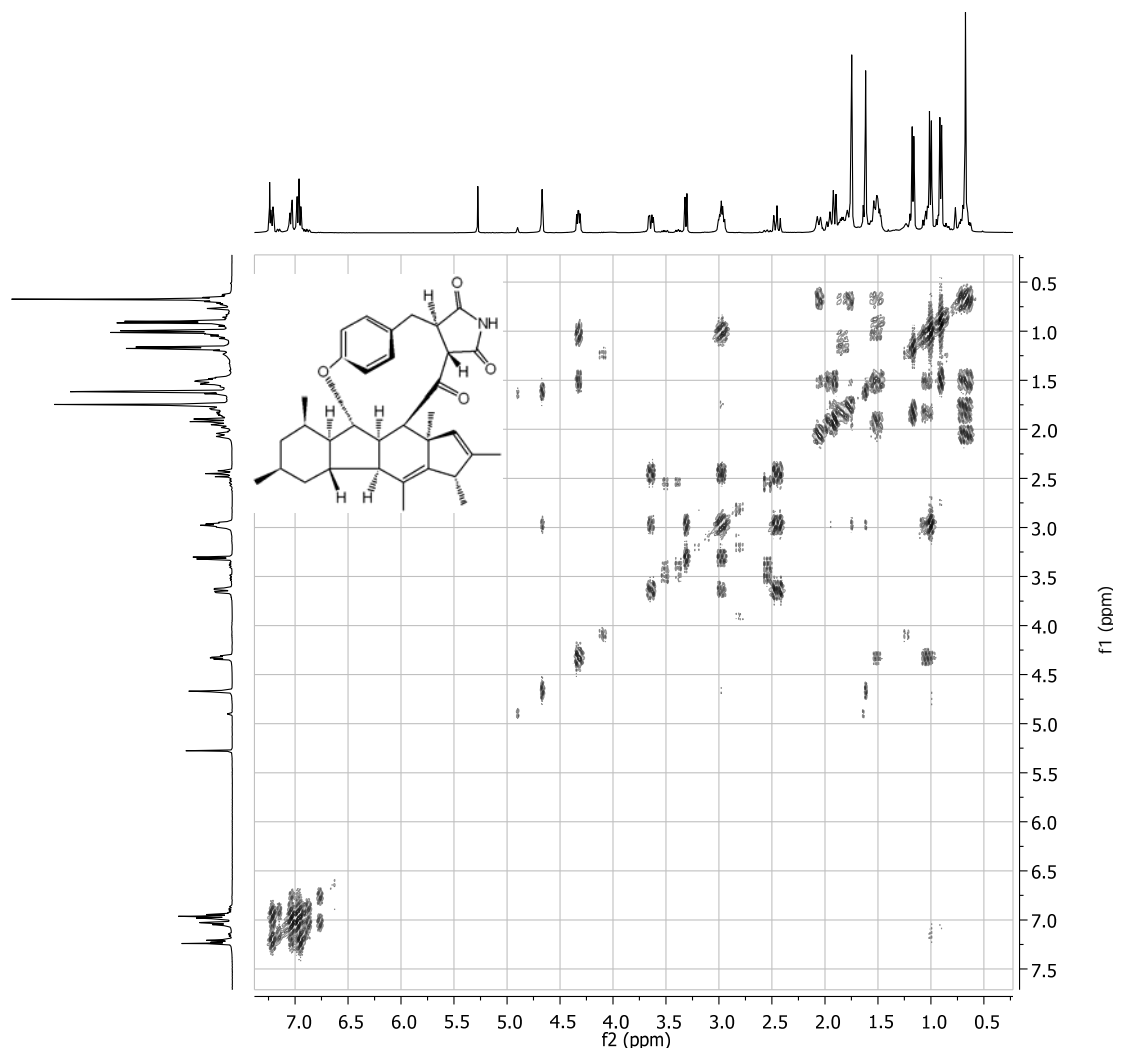

S10. HSQC spectrum of **2** in CDCl<sub>3</sub>

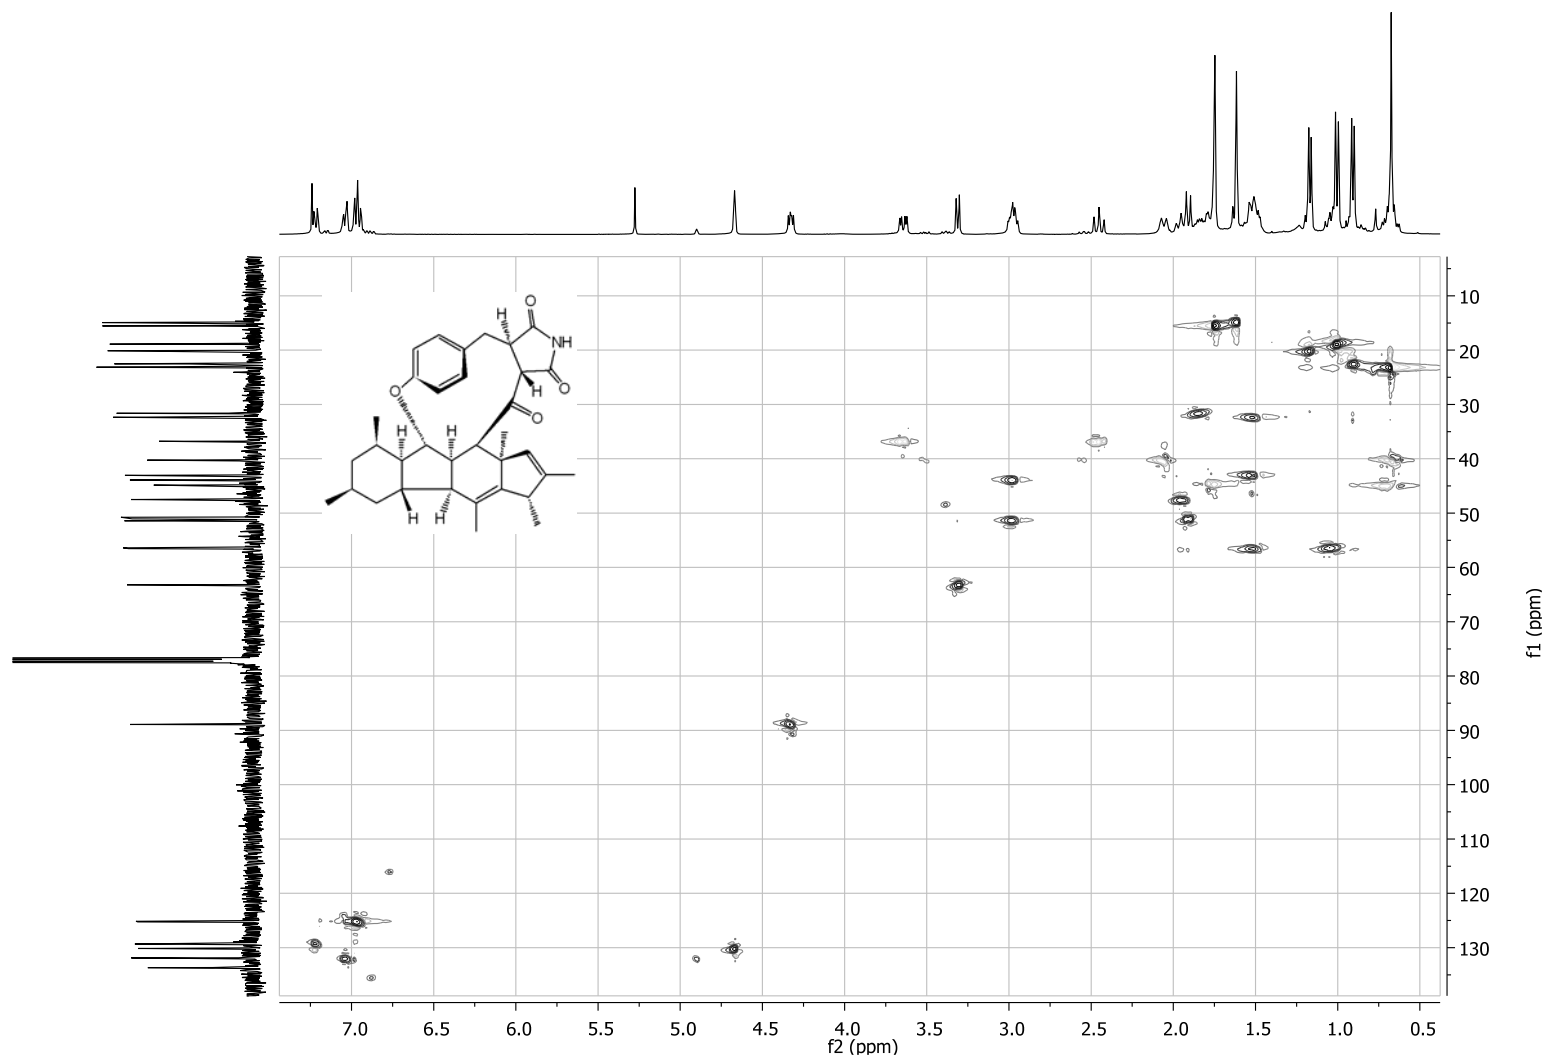

S11. HMBC spectrum of **2** in CDCl<sub>3</sub>

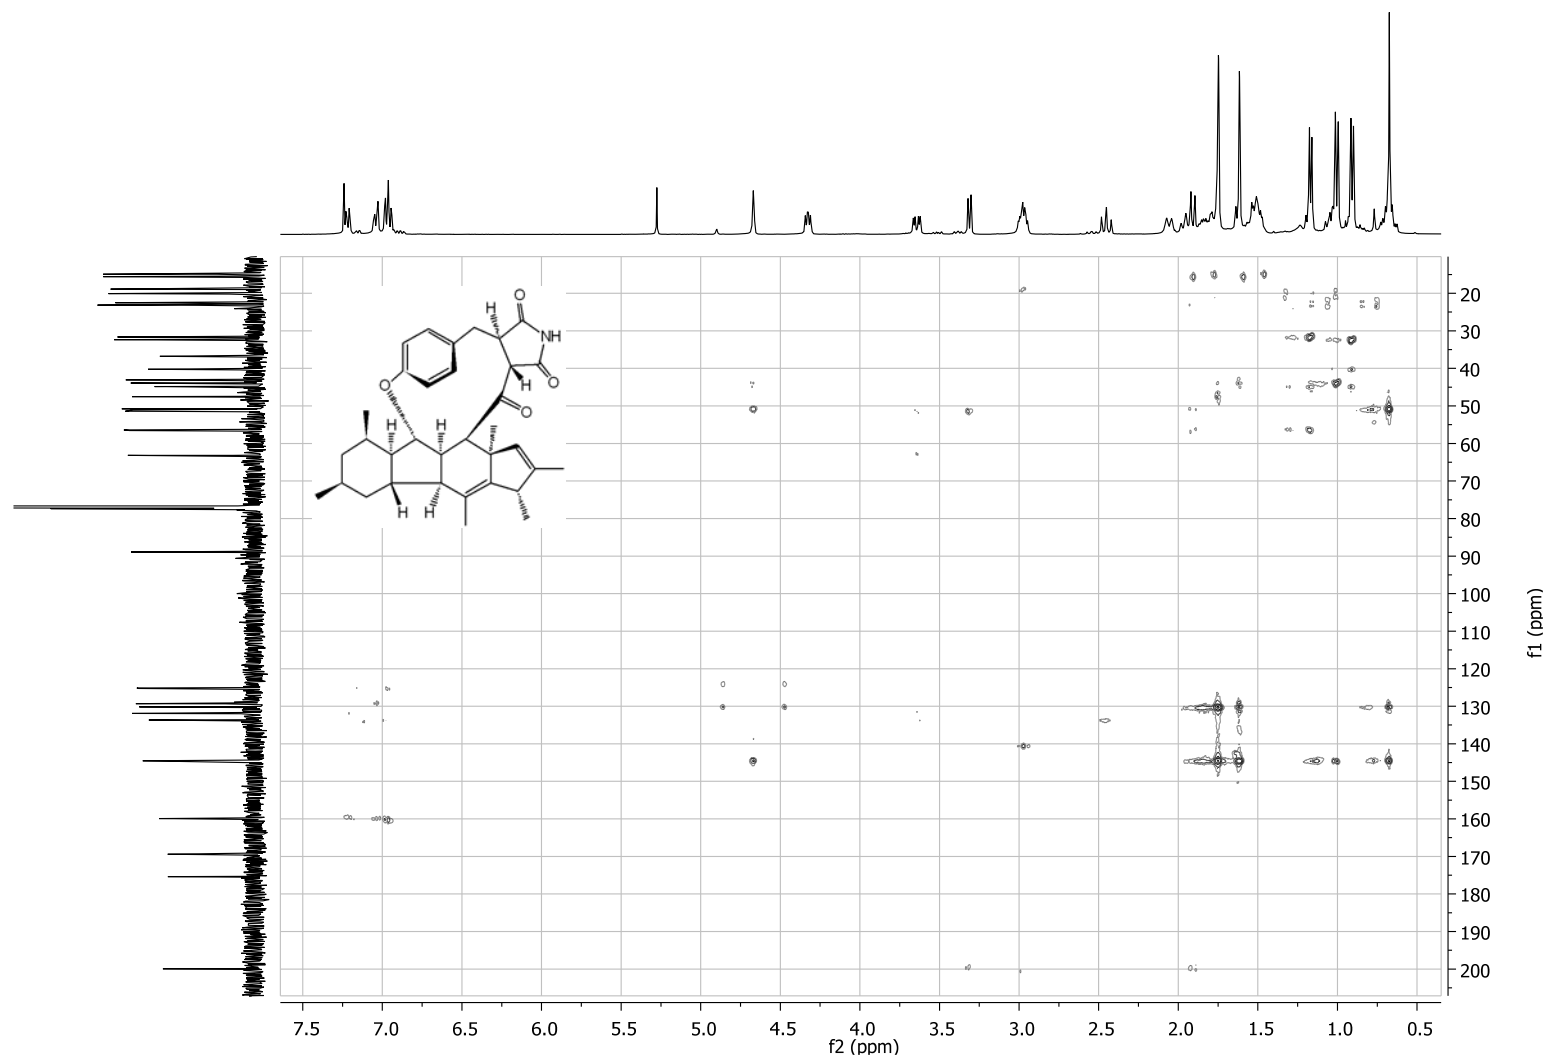

S12. ROESY spectrum of **2** in CDCl<sub>3</sub>

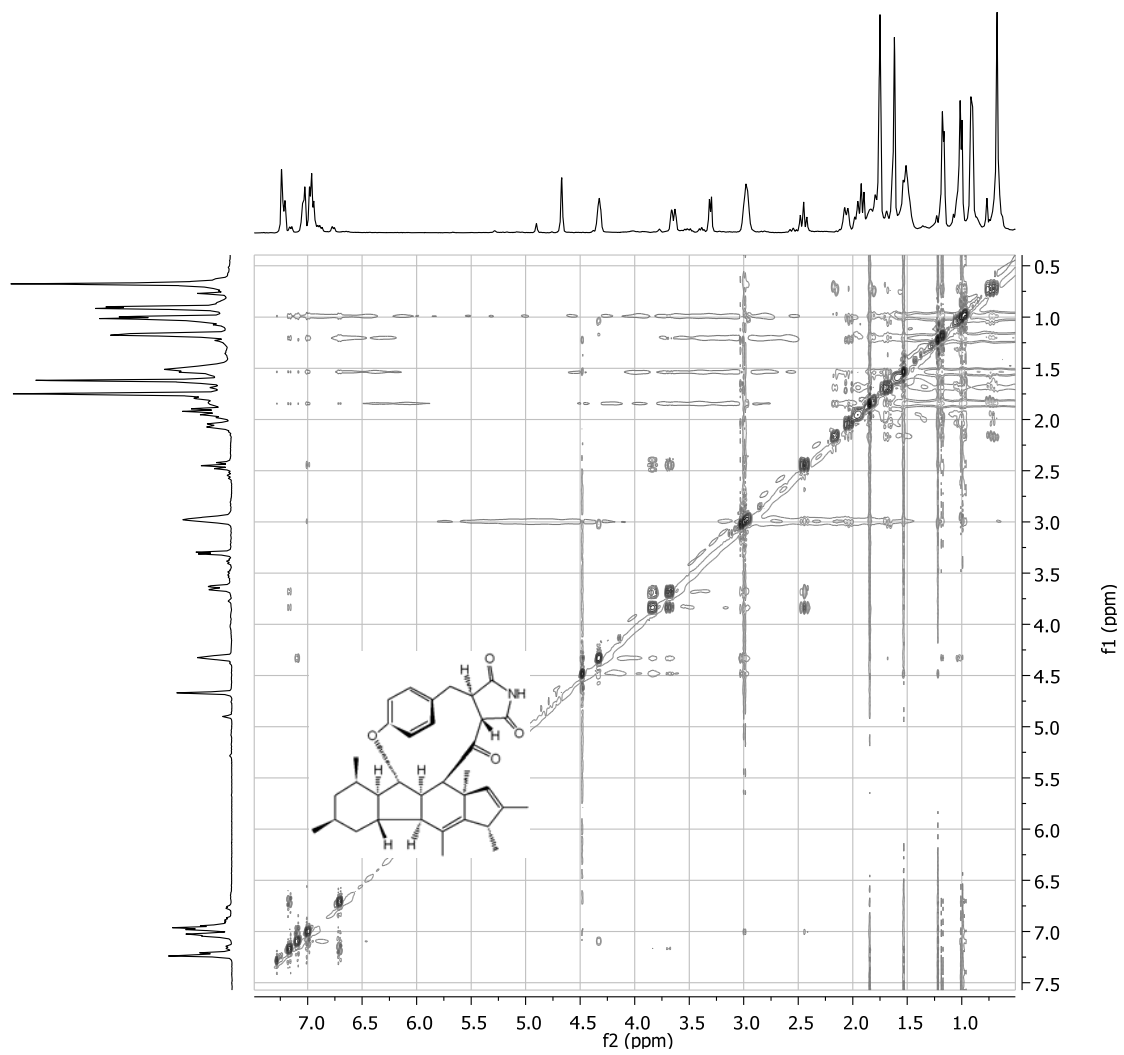

S13.  $^1\text{H}$  NMR spectrum (400 MHz) of **3** in  $\text{CDCl}_3$

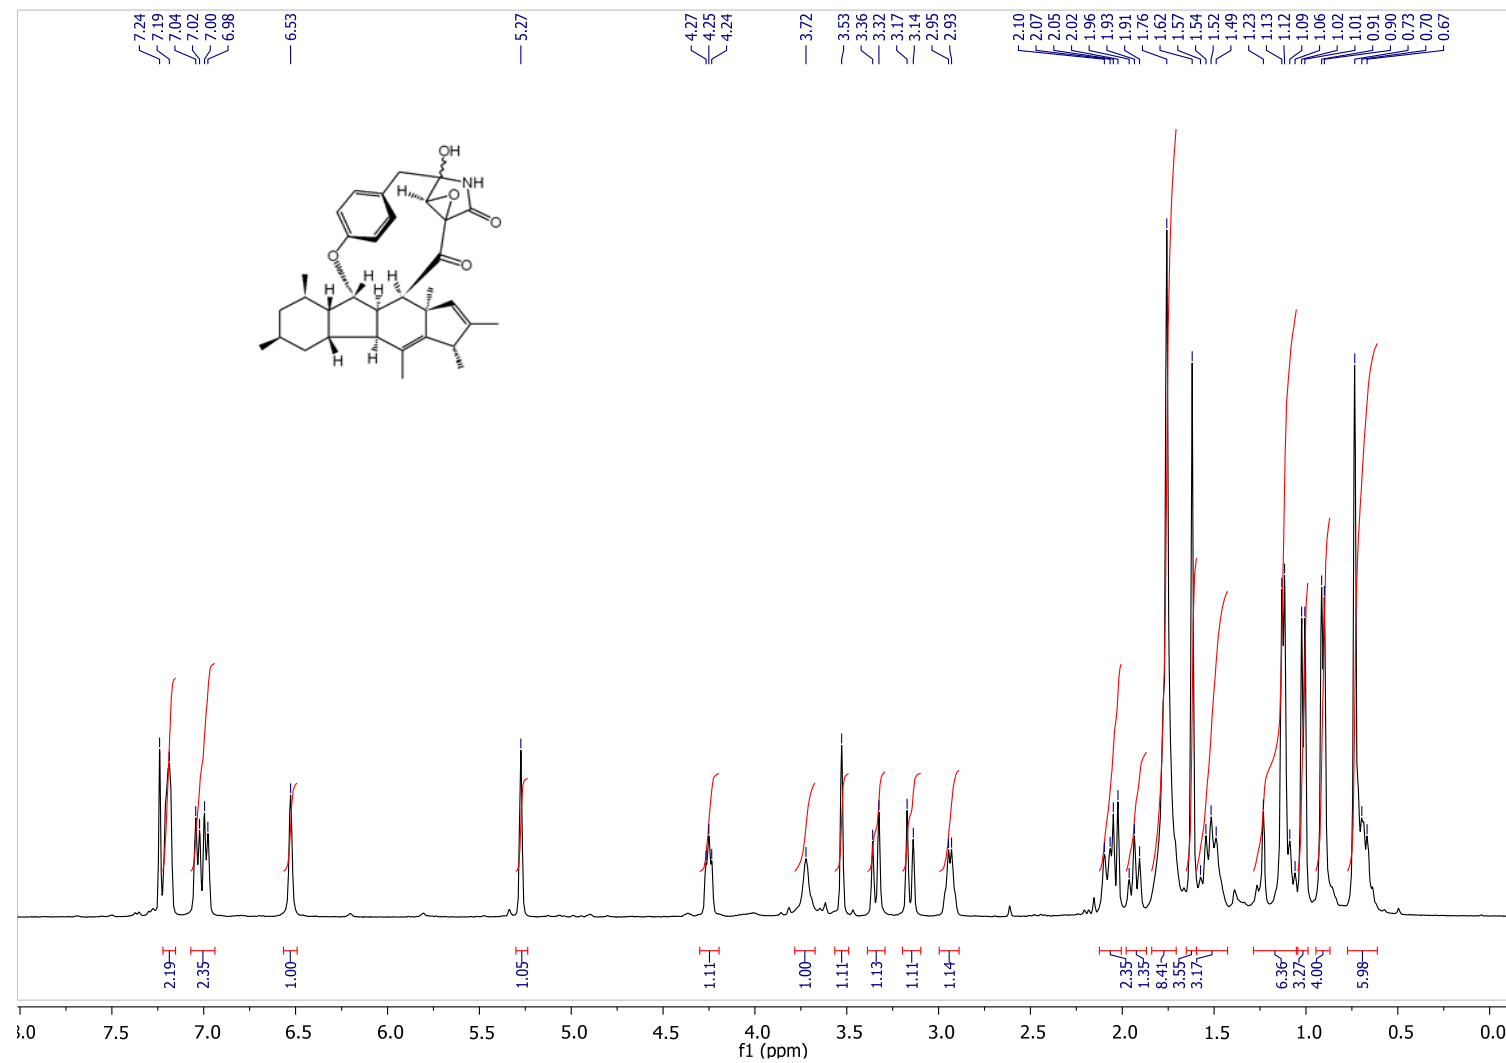

S14.  $^{13}\text{C}$  NMR spectrum (100 MHz) of **3** in  $\text{CDCl}_3$

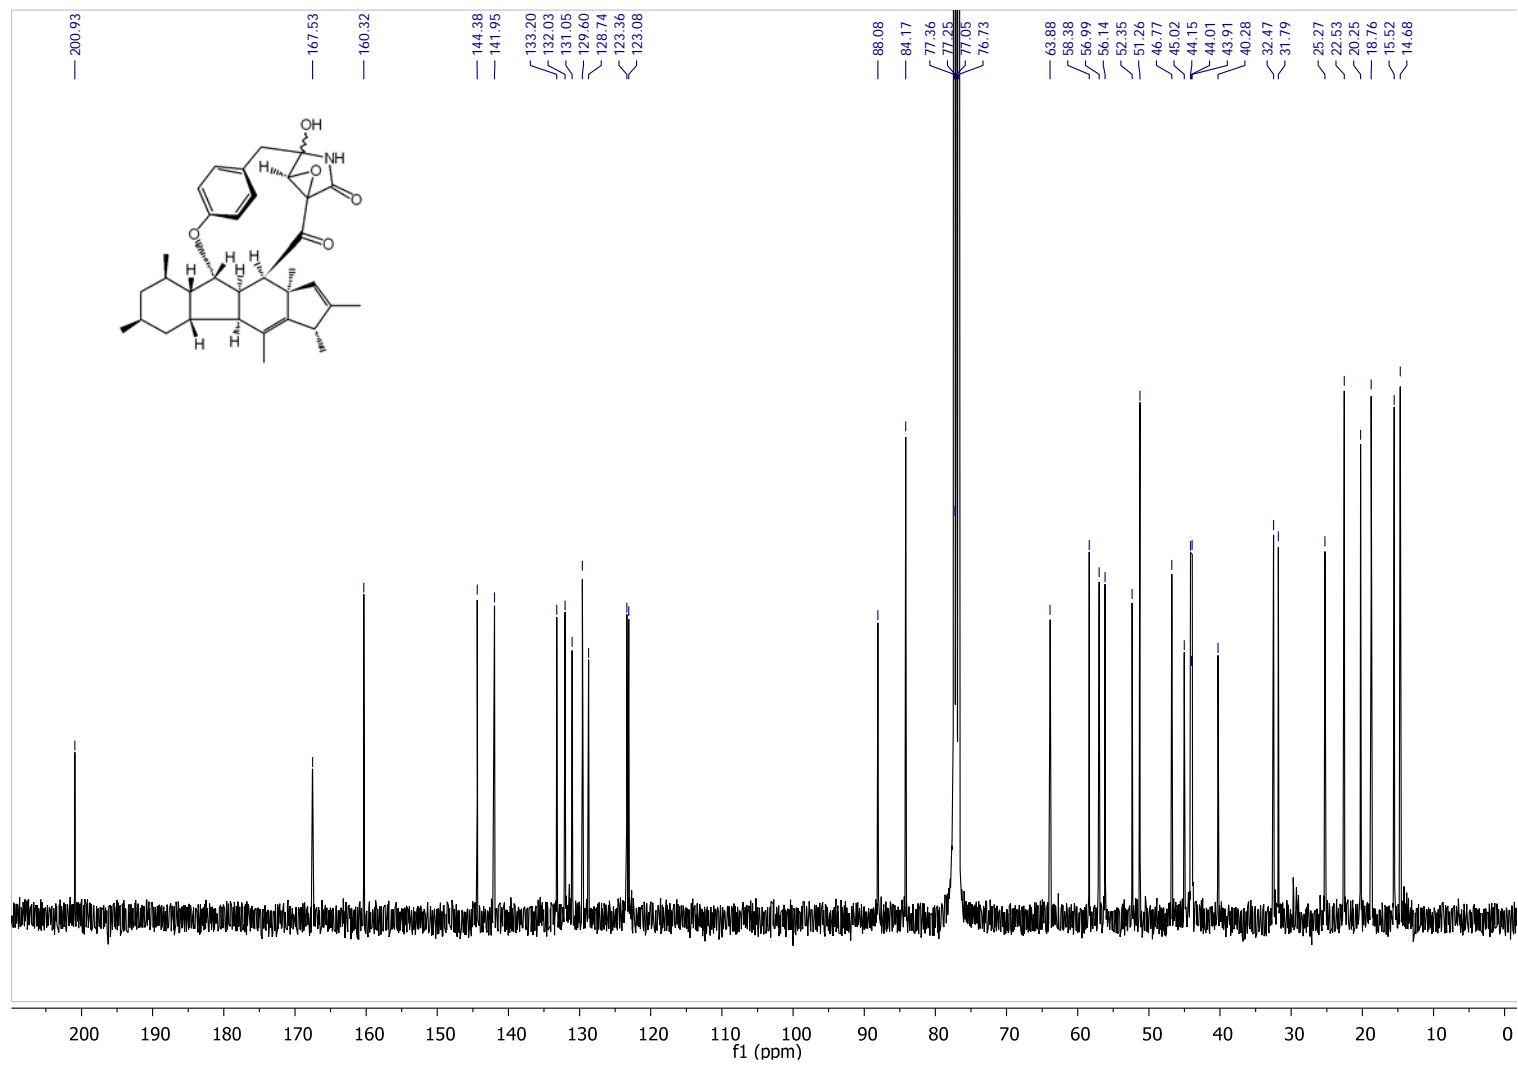



S15.  $^1\text{H}$ - $^1\text{H}$  COSY spectrum of **3** in  $\text{CDCl}_3$

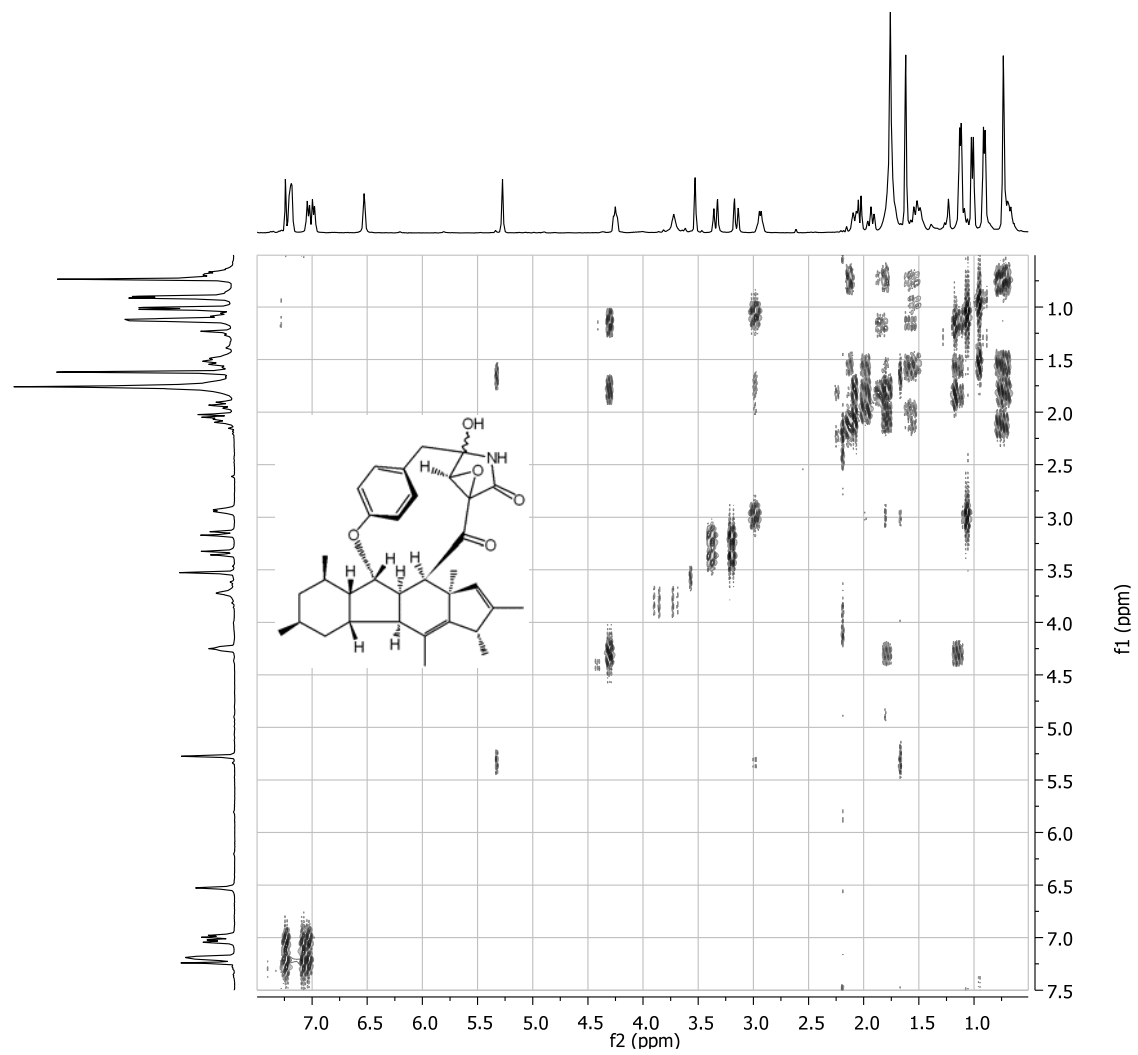

S16. HSQC spectrum of **3** in CDCl<sub>3</sub>

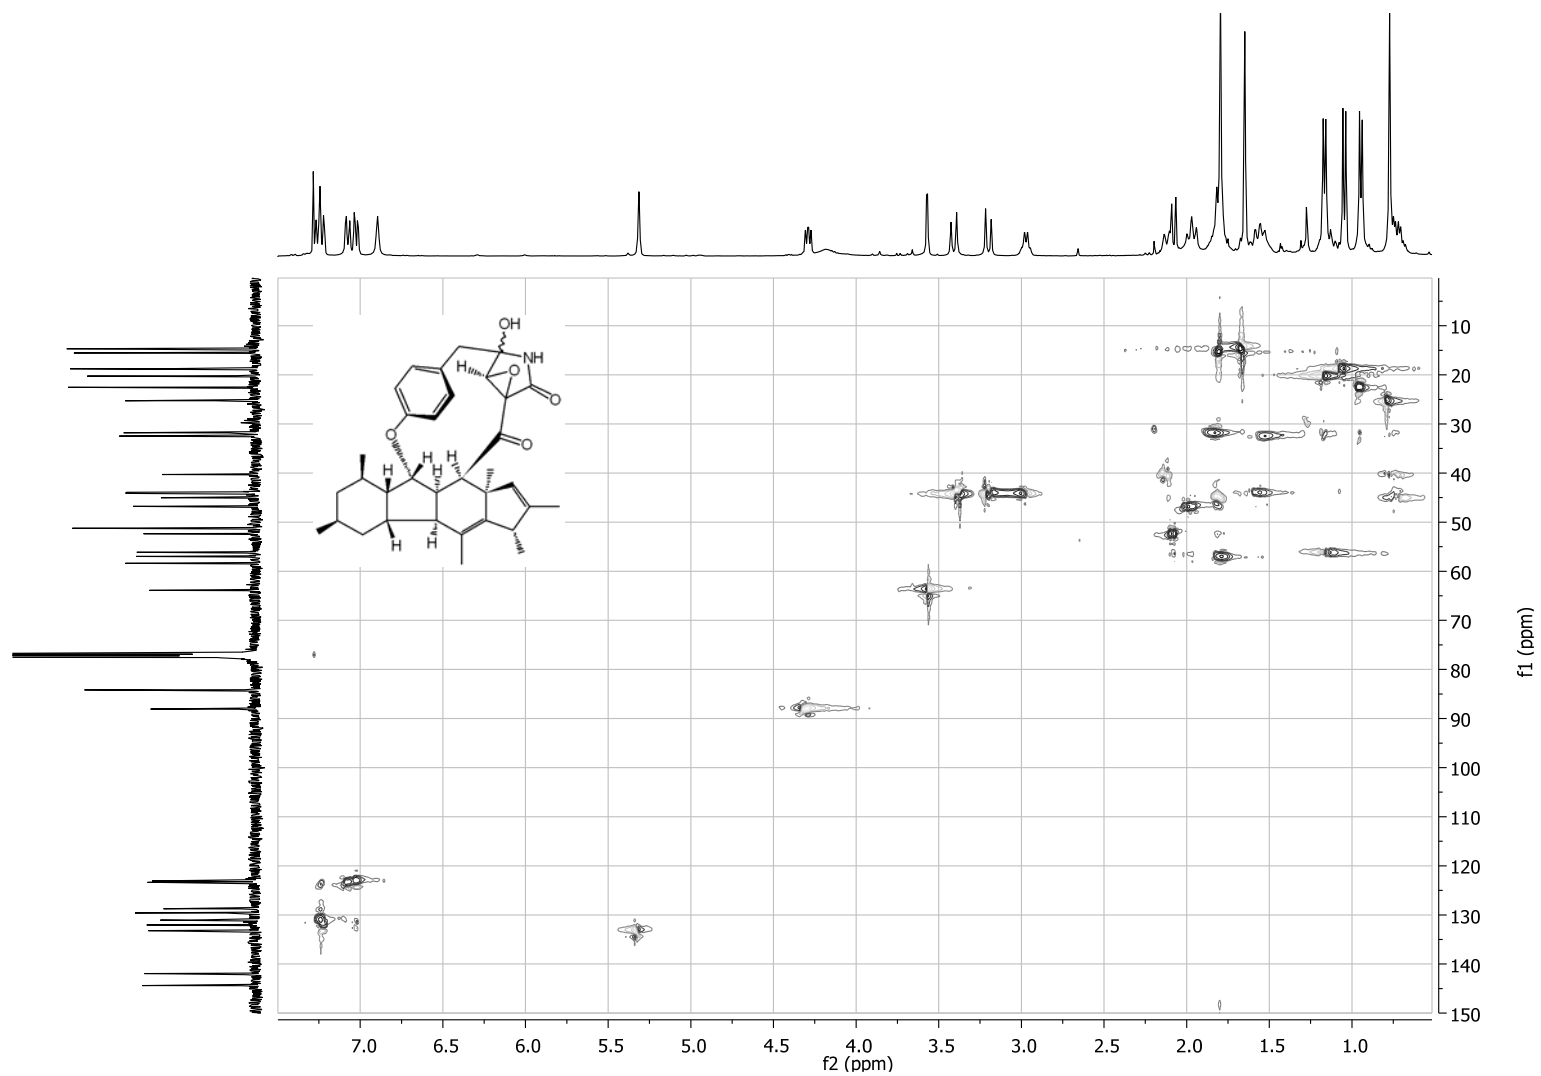

S17. HMBC spectrum of **3** in CDCl<sub>3</sub>

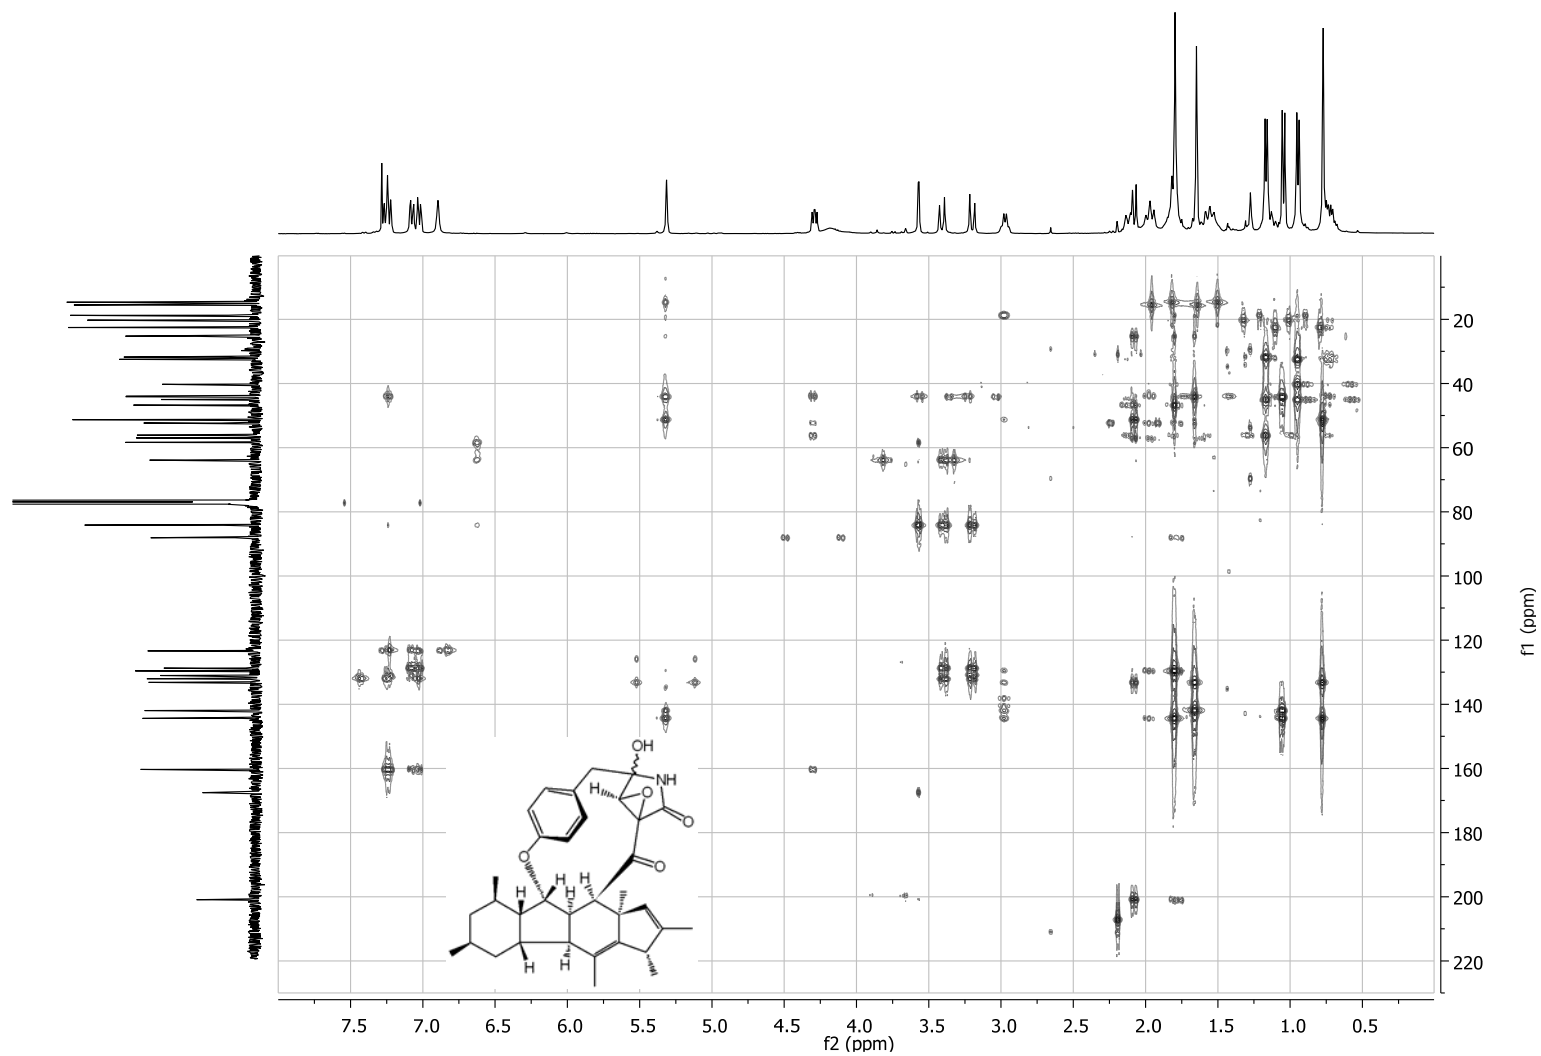

S18. ROESY spectrum of **3** in CDCl<sub>3</sub>

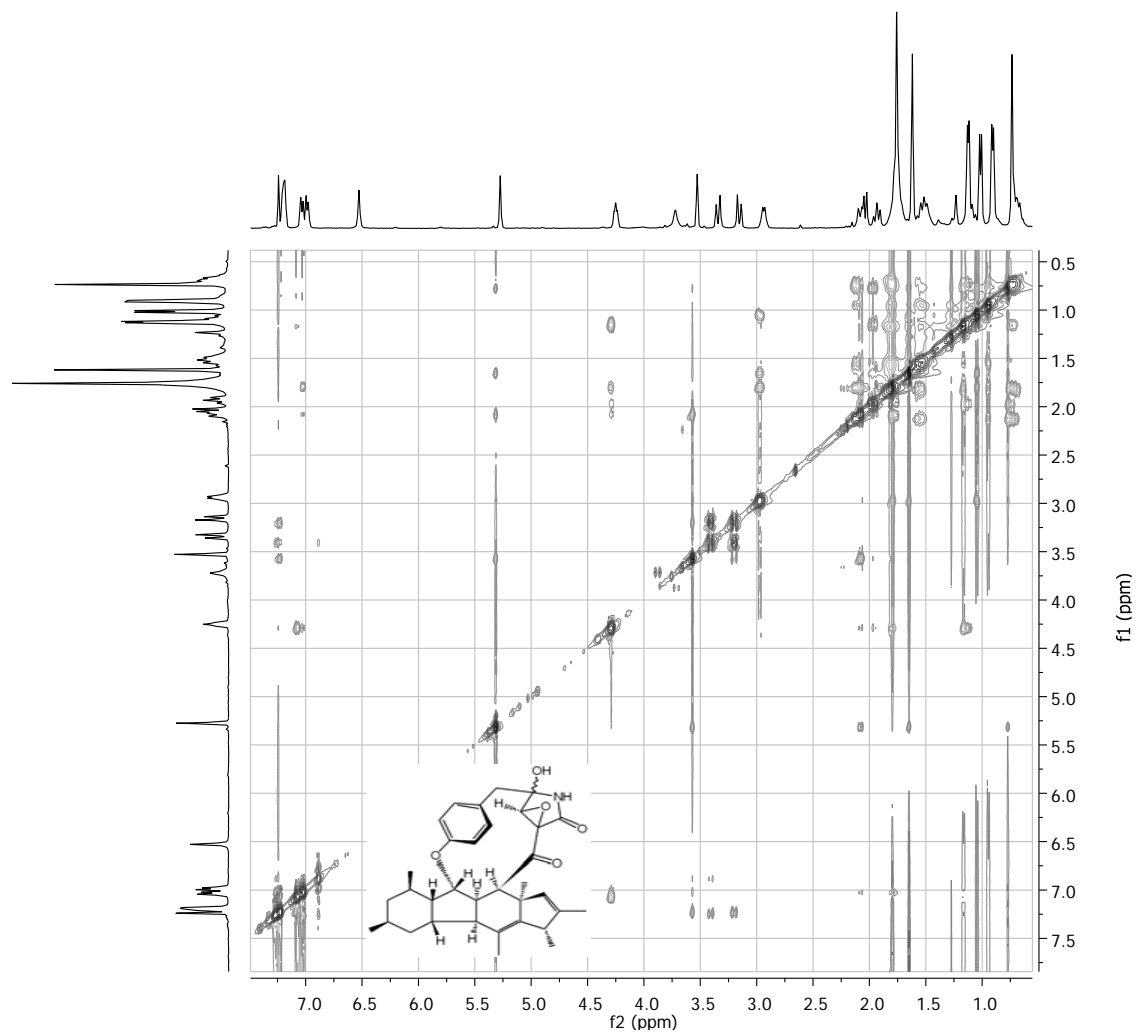

S19. <sup>1</sup>H NMR spectrum (400 MHz) of **4** in CDCl<sub>3</sub>

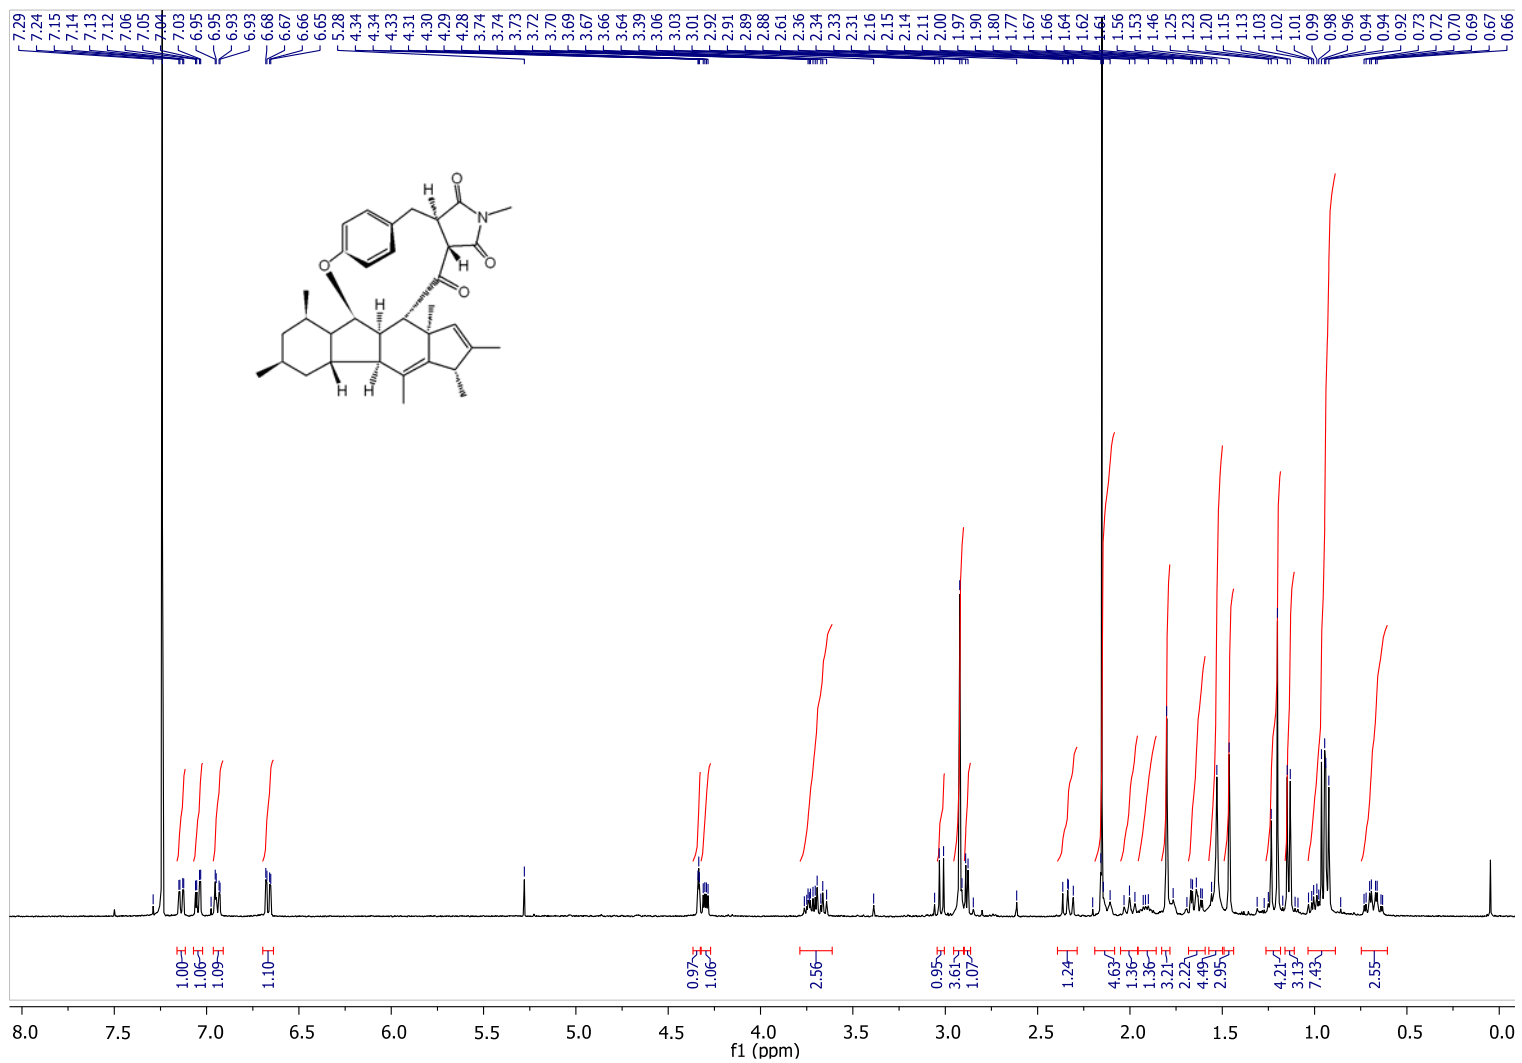

S20.  $^{13}\text{C}$  NMR spectrum (100 MHz) of **4** in  $\text{CDCl}_3$

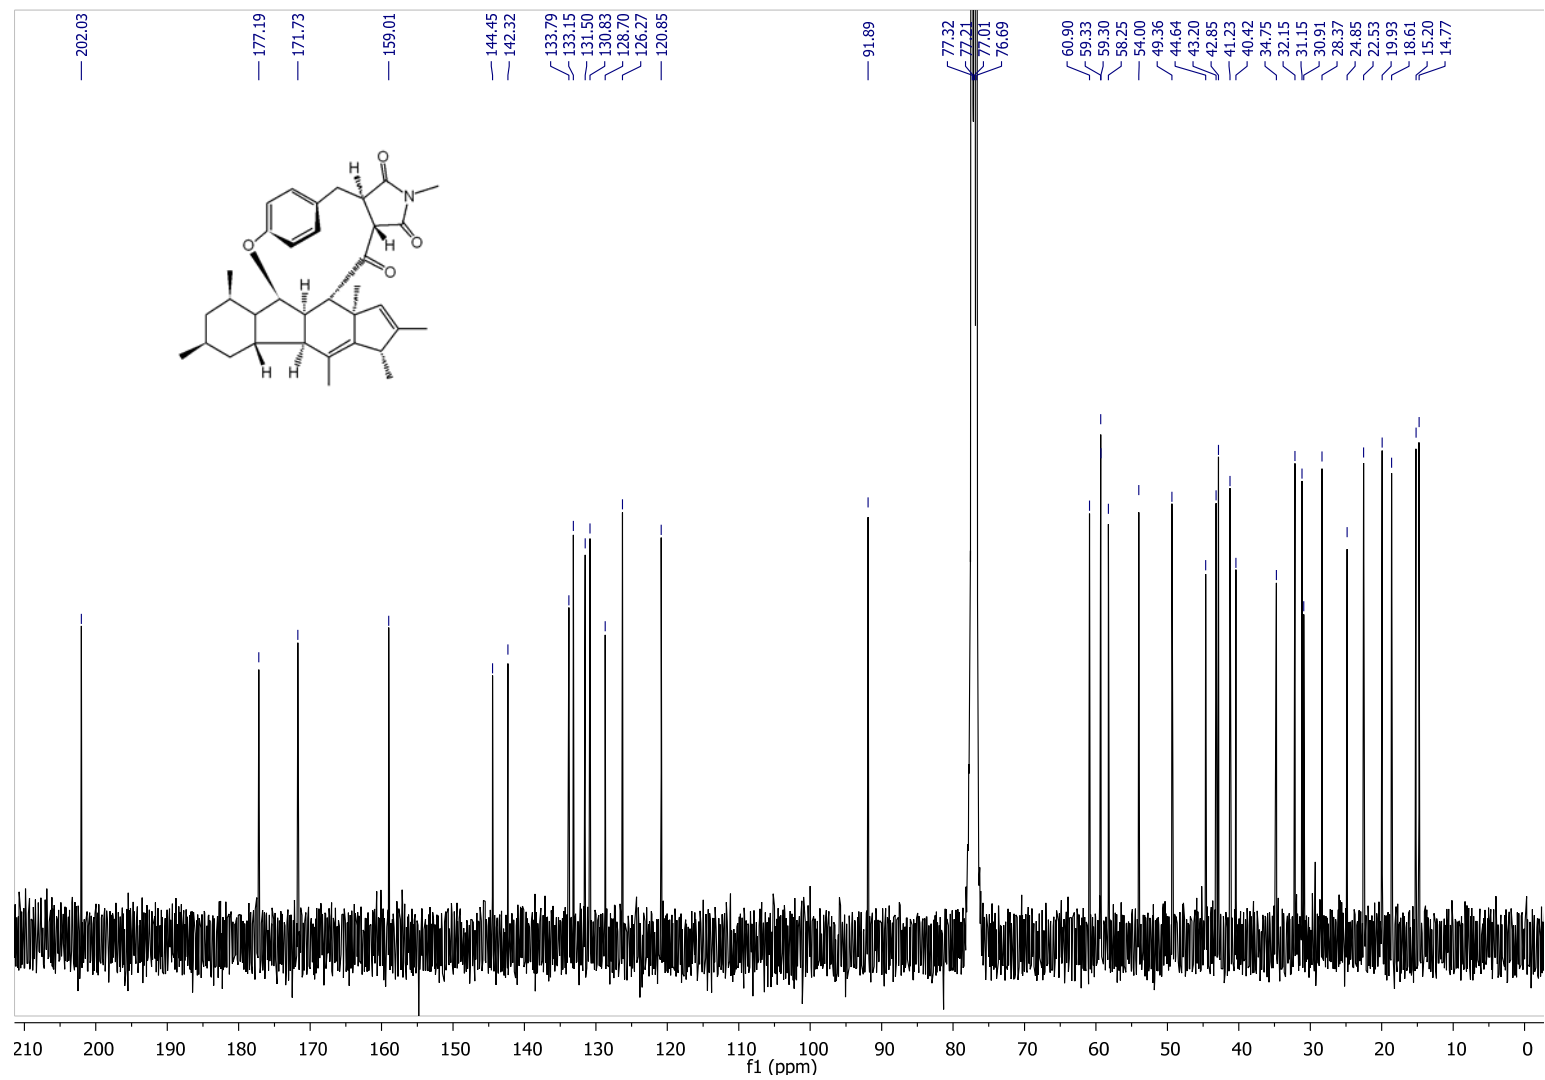

Supplement: NIHMS528837-supplement-1_si_001.pdf [file NIHMS528837-supplement-1_si_001.pdf]
